# Supplementary material
Source: PubMed Central journal article supplement (PMC6029853)
Supplement: NIHMS977707-supplement-Supplement.pdf [file NIHMS977707-supplement-Supplement.pdf]

# Supplemental Information

**SUPPLEMENTAL TABLE 3** ICD-9-CM Codes for Preterm Birth and LBW

|                                                                |
|----------------------------------------------------------------|
| 765 Disorders relating to short gestation and low birth weight |
| 765.0 Disorders relating to extreme immaturity of infant       |
| 765.00 Extreme immaturity, unspecified (weight)                |
| 765.01 Extreme immaturity, <500 g                              |
| 765.02 Extreme immaturity, 500–749 g                           |
| 765.03 Extreme immaturity, 750–999 g                           |
| 765.04 Extreme immaturity, 1000–1249 g                         |
| 765.05 Extreme immaturity, 1250–1499 g                         |
| 765.06 Extreme immaturity, 1500–1749 g                         |
| 765.07 Extreme immaturity, 1750–1999 g                         |
| 765.08 Extreme immaturity, 2000–2499 g                         |
| 765.09 Extreme immaturity, 2500 g and over                     |
| 765.1 Disorders relating to other preterm infants              |
| 765.10 Other preterm infants, unspecified (weight)             |
| 765.11 Other preterm infants, <500 g                           |
| 765.12 Other preterm infants, 500–749 g                        |
| 765.13 Other preterm infants, 750–999 g                        |
| 765.14 Other preterm infants, 1000–1249 g                      |
| 765.15 Other preterm infants, 1250–1499 g                      |
| 765.16 Other preterm infants, 1500–1749 g                      |
| 765.17 Other preterm infants, 1750–1999 g                      |
| 765.18 Other preterm infants, 2000–2499 g                      |
| 765.19 Other preterm infants, 2500 g and over                  |
| 765.2 Weeks of gestation                                       |
| 765.20 Unspecified weeks of gestation                          |
| 765.21 Less than 24 completed weeks of gestation               |
| 765.22 24 completed weeks of gestation                         |
| 765.23 25–26 completed weeks of gestation                      |
| 765.24 27–28 completed weeks of gestation                      |
| 765.25 29–30 completed weeks of gestation                      |
| 765.26 31–32 completed weeks of gestation                      |
| 765.27 33–34 completed weeks of gestation                      |
| 765.28 35–36 completed weeks of gestation                      |
| 765.29 37 or more completed weeks of gestation                 |

**SUPPLEMENTAL TABLE 4** ICD-9-CM Codes for Major Birth Defects

|                                                                                   |
|-----------------------------------------------------------------------------------|
| ICD-9-CM Codes for Major Birth Defects                                            |
| 740.0 Anencephalus                                                                |
| 740.1 Craniorachischisis                                                          |
| 741.0× Spina bifida with hydrocephalus                                            |
| 741.9× Spina bifida, without mention of hydrocephalus                             |
| 742.0 Encephalocele                                                               |
| 742.2 Holoprosencephaly                                                           |
| 743.00 Clinical anophthalmos, unspecified                                         |
| 743.03 Cystic eyeball, congenital                                                 |
| 743.06 Cryptophthalmos                                                            |
| 743.1× Microphthalmos                                                             |
| 743.3× Congenital cataract, unspecified                                           |
| 744.01 Congenital absence of external ear                                         |
| 744.23 Microtia                                                                   |
| 745.0 Common truncus                                                              |
| 745.10 Complete transposition of great vessels                                    |
| 745.11 Double outlet right ventricle                                              |
| 745.12 Corrected transposition of great vessels                                   |
| 745.19 Other transposition of great vessels                                       |
| 745.2 Tetralogy of Fallot                                                         |
| 745.3 Single ventricle                                                            |
| 745.60 Endocardial cushion defect, unspecified type                               |
| 745.61 Ostium primum defect                                                       |
| 745.69 Other endocardial cushion defects                                          |
| 746.01 Atresia of pulmonary valve, congenital                                     |
| 746.02 Stenosis of pulmonary valve, congenital                                    |
| 746.1 Tricuspid atresia and stenosis, congenital                                  |
| 746.2 Ebstein anomaly                                                             |
| 746.3 Congenital stenosis of aortic valve                                         |
| 746.7 Hypoplastic left heart syndrome                                             |
| 747.10 Coarctation of aorta (preductal) (postductal)                              |
| 747.11 Interruption of aortic arch                                                |
| 747.22 Aortic atresia/stenosis                                                    |
| 747.41 Total anomalous pulmonary venous connection                                |
| 749.0× Cleft palate                                                               |
| 749.1× Cleft lip                                                                  |
| 749.2× Cleft palate with cleft lip                                                |
| 748.0 Choanal atresia                                                             |
| 750.3 Tracheoesophageal fistula, esophageal atresia and stenosis, congenital      |
| 751.1 Small intestinal atresia/stenosis                                           |
| 751.2 Atresia and stenosis of large intestine, rectum, and anal canal, congenital |
| 751.5 Cloacal exstrophy                                                           |
| 751.61 Biliary atresia                                                            |
| 753.0 Renal agenesis and dysgenesis                                               |
| 753.20 Unspecified obstructive defect of renal pelvis and ureter                  |
| 753.21 Congenital obstruction of ureteropelvic junction                           |
| 753.22 Congenital obstruction of ureterovesical junction                          |
| 753.23 Congenital ureterocele                                                     |
| 753.29 Other obstructive defects of renal pelvis and ureter                       |
| 753.5 Exstrophy of urinary bladder                                                |

**TABLE 4** Continued

|                                                                    |
|--------------------------------------------------------------------|
| ICD-9-CM Codes for Major Birth Defects                             |
| 753.6 Atresia and stenosis of urethra and bladder neck, congenital |
| 752.61 Hypospadias                                                 |
| 754.51, 754.70 Clubfoot                                            |
| 755.2–755.4 Reduction defect of limb                               |
| 756.6 Anomalies of diaphragm, congenital                           |
| 756.72 Omphalocele                                                 |
| 756.73 Gastroschisis                                               |
| 758.0 Down syndrome                                                |
| 758.1 Patau syndrome                                               |
| 758.2 Edwards syndrome                                             |
| 758.32 Deletion 22q11.2                                            |
| 758.6 Turner syndrome                                              |
